# Supplementary material
Source: PubMed Central journal article supplement (PMC6140487)
Supplement: pnas.1809853115.sapp.pdf [file pnas.1809853115.sapp.pdf]

## Supplementary Information for

### **Human iPSC-derived trigeminal neurons lack constitutive TLR3-dependent intrinsic immunity that protects cortical neurons from HSV-1 infection**

Bastian Zimmer<sup>\*</sup>, Osefame Ewaleifoh<sup>\*</sup>, Oliver Harschnitz, Yoon-Seung Lee, Camille Peneau, Jessica L. McAlpine, Becky Liu, Jason Tchieu, Julius A. Steinbeck, Fabien Lafaille, Stefano Volpi, Luigi D. Notarangelo, Jean-Laurent Casanova<sup>#</sup>, Shen-Ying Zhang<sup>\*</sup>, Gregory A. Smith<sup>\*#</sup>, Lorenz Studer<sup>\*.#</sup>

\* equally contributed

<sup>#</sup> corresponding author: Jean-Laurent Casanova, Gregory A. Smith, Lorenz Studer

Email: casanova@rockefeller.edu, g-smith3@northwestern.edu, studerl@mskcc.org

#### **This PDF file includes:**

Figs. S1 to S6

Table S1

References for SI reference citations

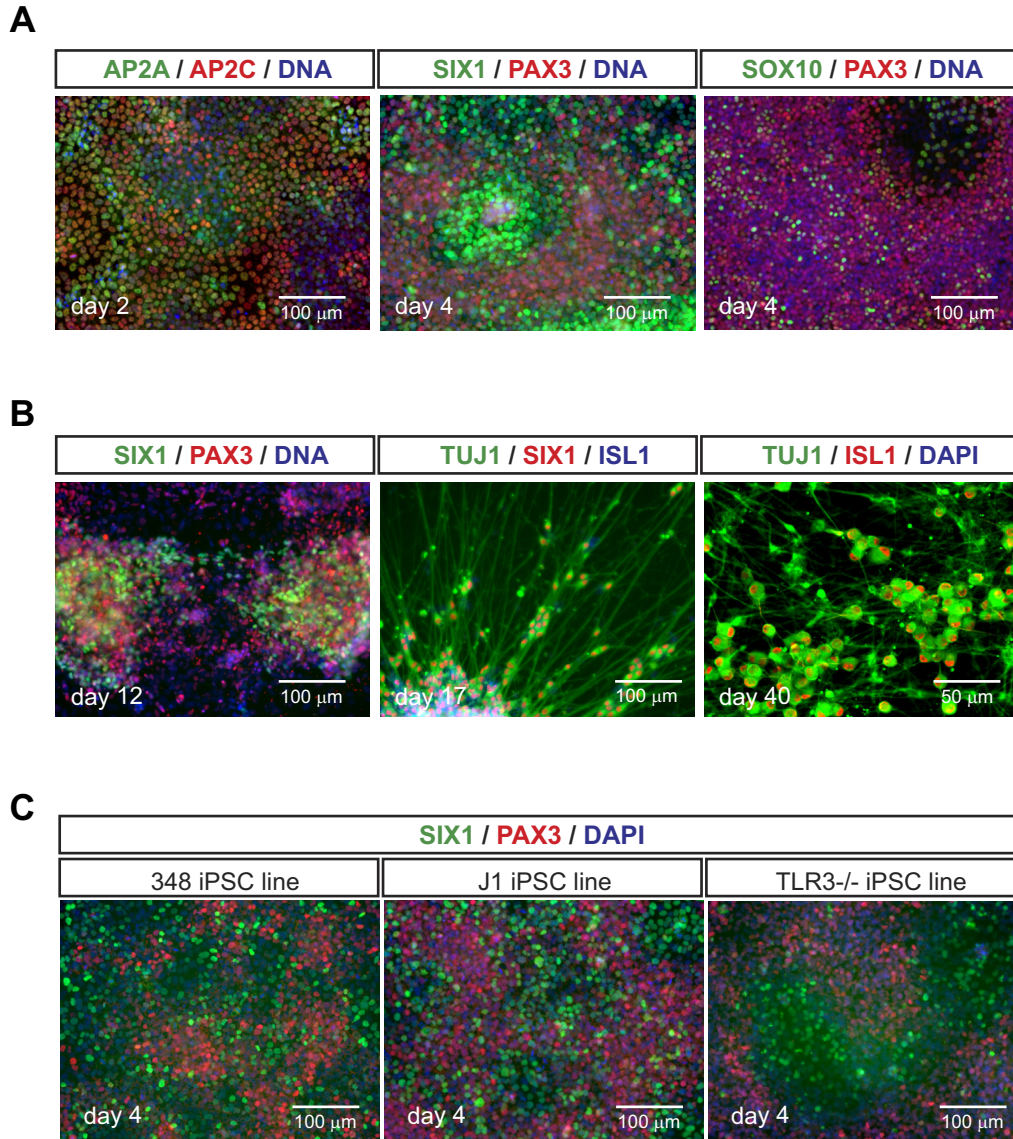

**Fig. S1. Immunocytochemical characterization of TG placodes. (A)** Early differentiation shows induction of AP2A, AP2C (day 2; left panel), SIX1, PAX3 (day 4; middle panel), and SOX10, PAX3 (day 4; right panel). **(B)** Neurogenic step at day 12 of differentiation shows maintenance of SIX1, PAX3 (day 12; left panel), neuronal differentiation by TUJ1, SIX1 (day 17; middle panel) and sensory neuron marker expression by ISL1 (day 40; right panel). **(C)** Validation of placode induction by SIX1, PAX3 expression at day 4 in three additional, independent human iPSC lines (348 iPSC line (1); left panel; J1 iPSC line (2); middle panel; TLR3<sup>-/-</sup> iPSC line; right panel).

**A**

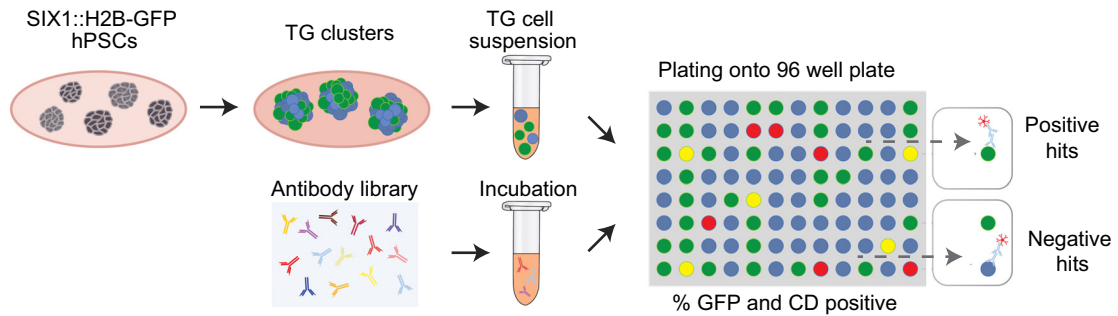

**B**

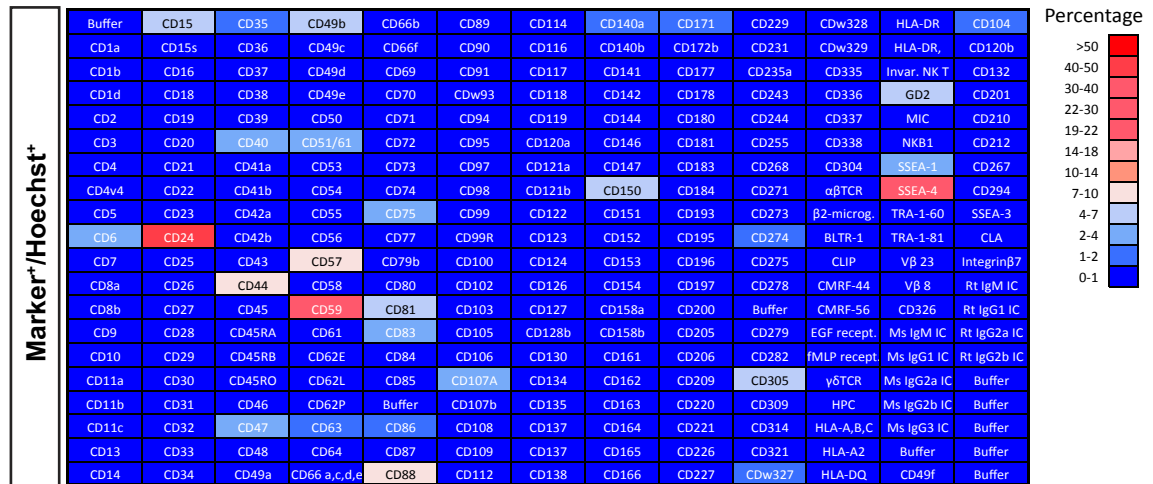

**C**

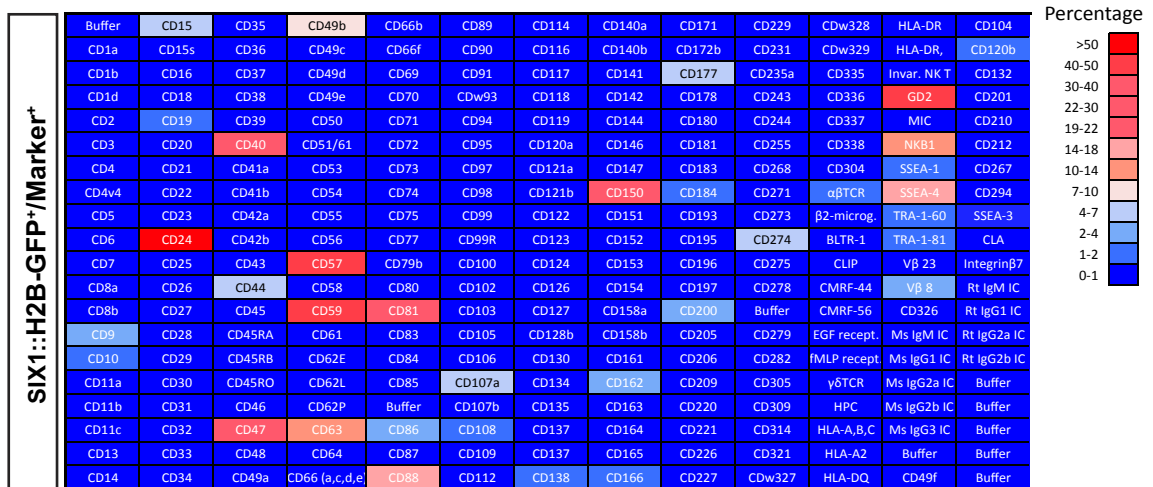

**Fig. S2. Cell surface marker screen on day 12 trigeminal neuron clusters. (A)** Schematic illustration of the experimental setup and readout. **(B)** Heat map of surface marker positive cells. Data is presented as percent of total cells (DAPI+). **(C)** Heat map of SIX1::H2B-GFP positive cells over surface marker positive cells. Data is presented as percent of marker positive cells.

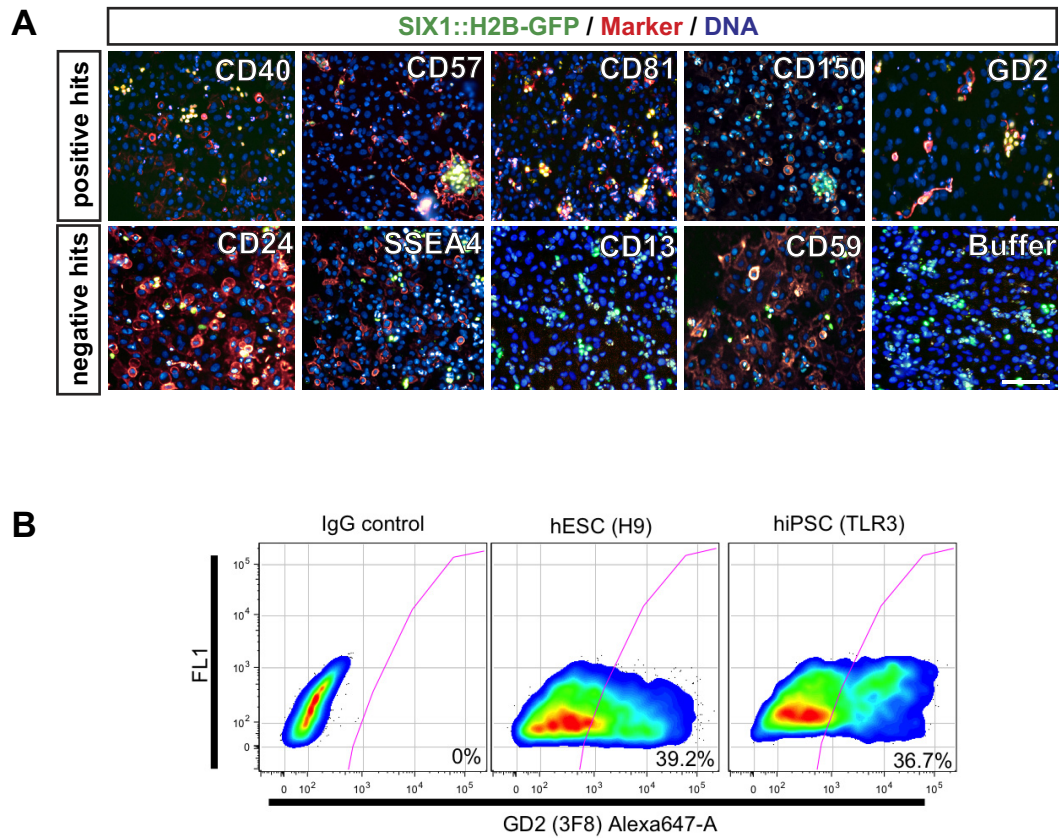

**Fig. S3. Cell surface marker screen on day 12 trigeminal neuron clusters. (A)** Representative images of 5 “positive” and 5 “negative” hits. Scale bar: 50  $\mu$ m. **(B)** Quantification of GD2 surface expression in human ESC (H9)- and iPSC (TLR3)-derived trigeminal neurons after 12 days of differentiation by flow cytometry.

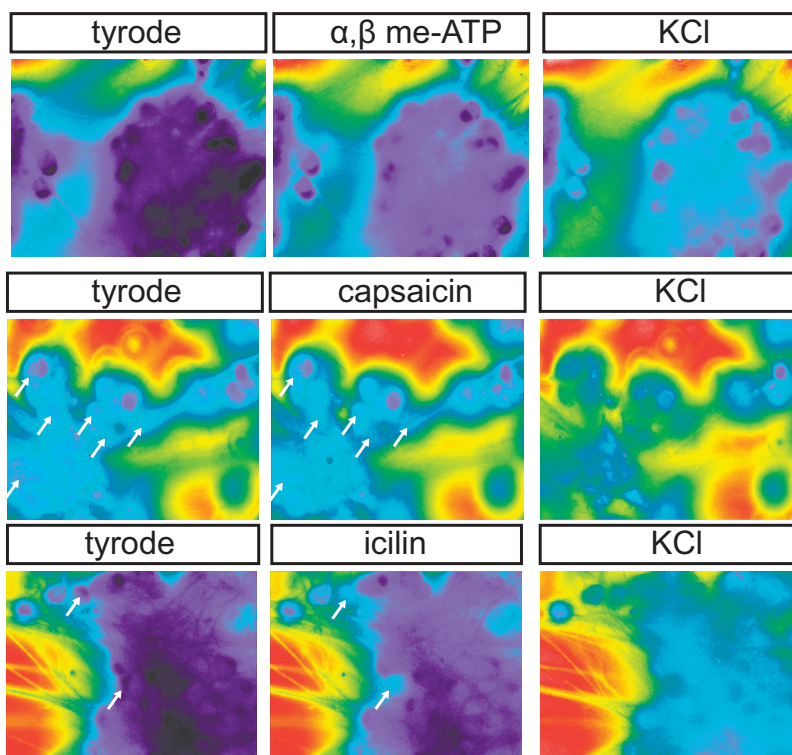

**Fig. S4. Calcium response to tyrode, capsaicin, icilin, ATP, and KCl.** Representative ratiometric image of a day 60, GD2 sorted TG neuron culture after incubation with the calcium indicator Fura-2. Images correspond to the frame of the time course analysis of the peak response to the respective molecule. Arrows indicate responding cells.

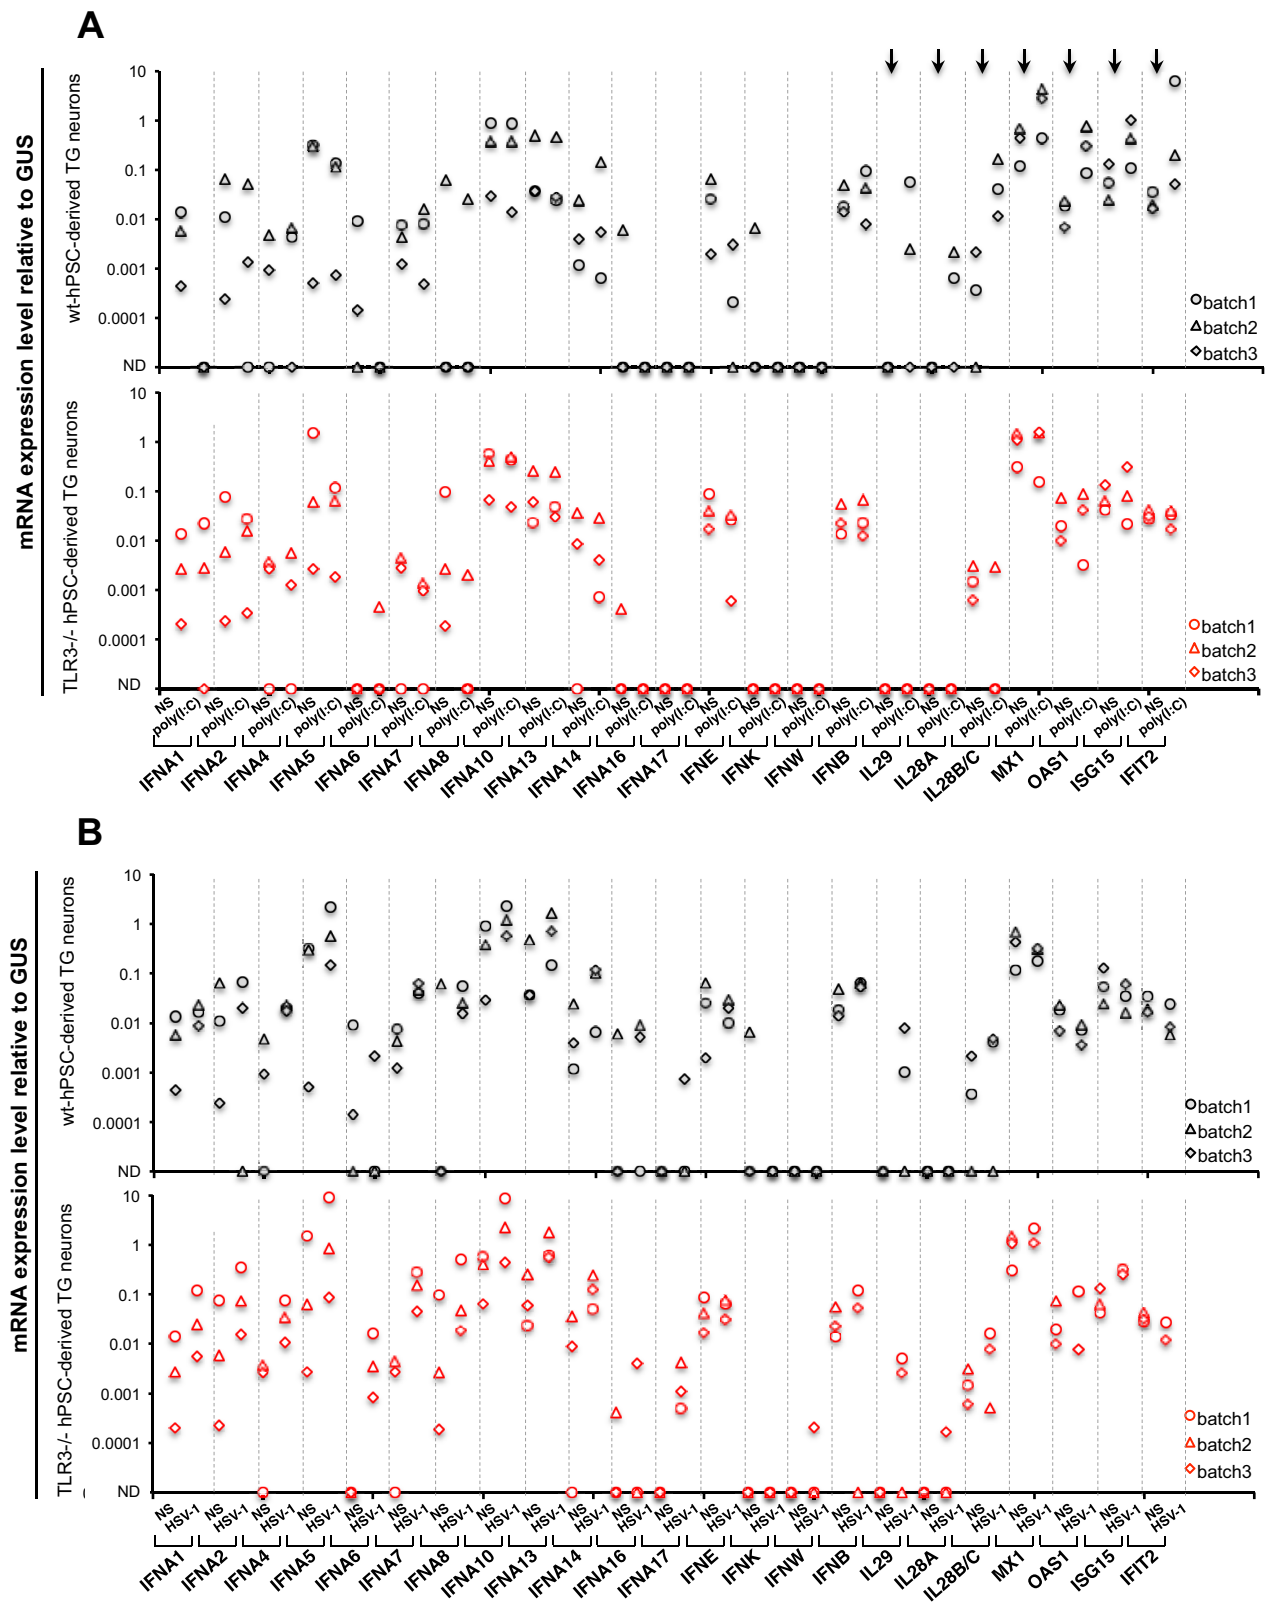

**Fig. S5. Gene expression for 19 different IFNs and 4 different ISGs upon poly(I:C) or HSV-1 stimulation.** The relative expression levels of IFNs and ISGs in TG neurons derived from TLR3 wild-type control human ESCs versus TLR3<sup>-/-</sup> iPSCs was assessed under basal conditions and compared to (A) stimulation with poly(I:C) or (B) following exposure to HSV-1. IFNs that showed a clear increase in gene expression following poly(I:C) treatment in control but not in TLR3<sup>-/-</sup> TGs are indicated with a black arrow. ND: not detected.

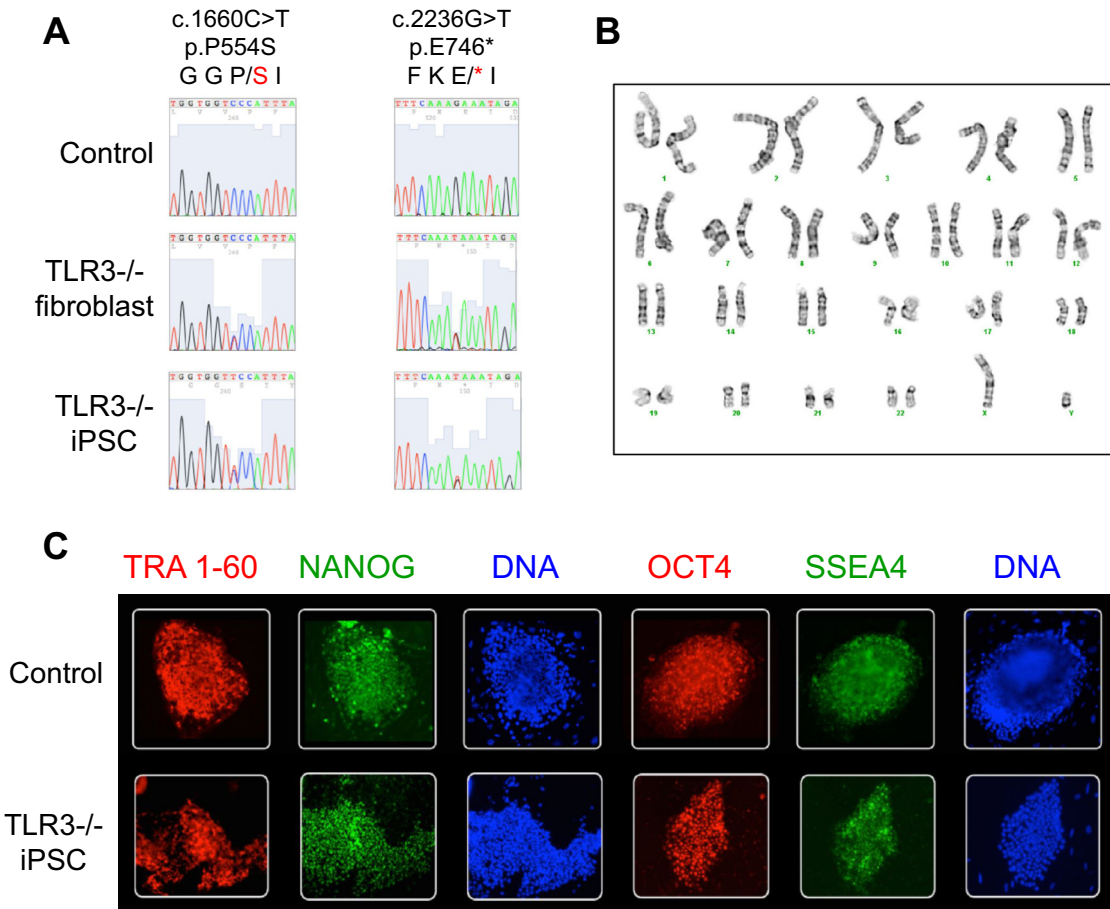

**Fig. S6. Characterization of Sendai-vector induced iPSCs from control and TLR3-deficient patient fibroblasts.** (A) Sequence analysis of the TLR3 mutation in fibroblasts and iPSCs. (B) Normal karyotype of TLR3-/- iPSCs by G-banding. (C) Expression of pluripotent markers TRA-1-60, NANOG, POU5F1 (OCT4) and SSEA-4 in TLR3-/- patient-specific iPSCs.

**Table S1. List of antibodies used in this study**

| Name          | Company                              | catalogue #    | dilution |
|---------------|--------------------------------------|----------------|----------|
| Brn-3A        | Millipore                            | MAB1585        | 1:200    |
| GD2 (3F8)     | gift from Nai-Kong Cheung (MSKCC)    | not applicable | 1:1000   |
| GD2 (14G2a)   | BD Pharmigen                         | 554272         | 1:500    |
| ISL1          | Developmental Studies Hybridoma Bank | 39.4D5         | 1:100    |
| NANOG         | Cell Signaling                       | 4903           | 1:500    |
| PAX3          | DSHB                                 | Pax3           | 1:100    |
| Peripherin    | Santa Cruz                           | SC-7604        | 1:200    |
| POU5F1 (OCT4) | Cell Signaling                       | 2840           | 1:500    |
| SIX1          | Sigma                                | HPA001893      | 1:1000   |
| SOX2          | Cell Signaling                       | 3579           | 1:500    |
| SOX10         | Cell Signaling                       | 89356S         | 1:100    |
| SSEA3         | Santa Cruz                           | SC-21703       | 1:100    |
| SSEA4         | Millipore                            | MAB4304        | 1:200    |
| AP2A (TFAP2A) | Abcam                                | Ab108311       | 1:100    |
| AP2C (TFAP2C) | Sigma                                | HPA055179      | 1:250    |
| TRA1-81       | Millipore                            | MAB4381        | 1:200    |
| TUJ1          | Covance                              | MMS-435P       | 1:1000   |



## References

1. Miller JD, *et al.* (2013) Human iPSC-based modeling of late-onset disease via progerin-induced aging. *Cell Stem Cell* 13(6):691-705.
2. Kriks S, *et al.* (2011) Dopamine neurons derived from human ES cells efficiently engraft in animal models of Parkinson's disease. *Nature* 480(7378):547-551.
